# Supplementary material for: Early nutritional programming affects liver transcriptome in diploid and triploid Atlantic salmon, Salmo salar
Source: BMC Genomics. 2017 Nov 17;18:886. doi: 10.1186/s12864-017-4264-7 (PMC5693578; doi:10.1186/s12864-017-4264-7)
Supplement: Supplementary file 5 — List of genes differentially expressed according to two-way ANOVA (p < 0.05) and affected by the interaction diet x ploidy. FC: Fold Change; KO: KEGG Orthology; M: marine V: vegetable. (XLSX 30 kb) [file 12864_2017_4264_MOESM5_ESM.xlsx]

## Sheet: Sheet1
KO	KEGG Annotation	Gene abbreviation	FC V/M Diploids	FC V/M Triploids
K12852	116 kDa U5 small nuclear ribonucleoprotein component	EFTUD2	-1.21911	1.10653
K06630	14-3-3 protein epsilon	YWHAE	1.07461	1.3012
K02730	20S proteasome subunit alpha 1	PSMA6	1.07138	1.29144
K02726	20S proteasome subunit alpha 2	PSMA2	1.13275	1.45138
K03032	26S proteasome regulatory subunit N2	PSMD1, RPN2	-1.03679	1.35078
K03065	26S proteasome regulatory subunit T5	PSMC3, RPT5	-1.02125	1.26549
K03066	26S proteasome regulatory subunit T6	PSMC5, RPT6	1.02703	1.2553
K13524	4-aminobutyrate aminotransferase / (S)-3-amino-2-methylpropionate transaminase	ABAT	-1.20014	-4.17204
K00643	5-aminolevulinate synthase	E2.3.1.37, ALAS	1.28015	-1.30217
K11089	60 kDa SS-A/Ro ribonucleoprotein	TROVE2, SSA2	-1.17347	-1.01077
K17817	8-oxo-dGDP phosphatase	NUDT18, MTH3	-1.32278	2.85352
K18646	acidic leucine-rich nuclear phosphoprotein 32 family member A/C/D	ANP32A_C_D	-2.27745	1.65712
K05757	actin related protein 2/3 complex, subunit 1A/1B	ARPC1A_B	-2.46838	2.25574
K12314	actin, alpha cardiac muscle	ACTC1	1.5689	-1.67058
K00232	acyl-CoA oxidase	E1.3.3.6, ACOX1, ACOX3	1.21133	1.89587
K01251	adenosylhomocysteinase	E3.3.1.1, ahcY	-1.36788	1.16857
K08047	adenylate cyclase 7	ADCY7	-1.00803	-1.43563
K11996	adenylyltransferase and sulfurtransferase	MOCS3, UBA4, moeB	-1.55457	2.26234
K07297	adiponectin receptor	ADIPOR	-1.91152	1.17385
K07955	ADP-ribosylation factor-like protein 8	ARL8	1.34688	1.00598
K04142	adrenergic receptor beta-2	ADRB2	1.61846	-1.25115
K18617	allograft inflammatory factor 1	AIF1	1.49559	-1.03165
K09516	all-trans-retinol 13,14-reductase	RETSAT	1.21007	-1.02057
K00736	alpha-1,6-mannosyl-glycoprotein beta-1,2-N-acetylglucosaminyltransferase	MGAT2	1.44224	1.08538
K03847	alpha-1,6-mannosyltransferase	ALG12	-1.14054	-1.69566
K03354	anaphase-promoting complex subunit 7	APC7	-1.13724	1.33964
K09708	angiotensin-converting enzyme 2	ACEH, ACE2	1.79123	-1.24411
K12460	ankyrin repeat-rich membrane spanning protein	KIDINS220, ARMS	-1.11442	2.08471
K06172	anterior pharynx defective 1	APH1	1.27045	-1.43901
K12391	AP-1 complex subunit gamma-1	AP1G1	1.32285	-1.23864
K12799	apoptosis-associated speck-like protein containing a CARD	PYCARD, ASC	1.31286	-1.56221
K09864	aquaporin-1	AQP1	1.32206	-1.73819
K12488	Arf-GAP with SH3 domain, ANK repeat and PH domain-containing protein	ASAP	1.39001	-1.22093
K01755	argininosuccinate lyase	argH, ASL	-1.25739	-1.75299
K17339	atlastin	ATL	-1.62159	-1.16539
K13025	ATP-dependent RNA helicase	EIF4A3, FAL1	-1.59458	-1.27581
K13182	ATP-dependent RNA helicase DDX39	DDX39	-1.62458	-1.24302
K14809	ATP-dependent RNA helicase DDX55/SPB4	DDX55, SPB4	-1.45922	-1.17838
K11653	AT-rich interactive domain-containing protein 1	ARID1	1.37389	-1.26779
K19399	BBSome-interacting protein 1	BBIP1	1.2989	1.0106
K15618	B-cell lymphoma 6 protein	BCL6	-1.61953	1.23132
K04570	BCL2-like 1 (apoptosis regulator Bcl-X)	BCL2L1, bcl-xL	1.13429	-1.1801
K04439	beta-arrestin	ARRB	-2.36486	2.59464
K00214	biliverdin reductase	BLVRA, bvdR	-2.16011	3.23558
K10477	BTB/POZ domain-containing protein 1/2	BTBD1_2	-1.52352	1.00185
K05853	Ca2+ transporting ATPase, sarcoplasmic/endoplasmic reticulum	ATP2A	-4.22646	1.43264
K08272	calcium binding protein 39	CAB39, MO25	-1.69224	1.70496
K16056	calcium release-activated calcium channel protein 1	ORAI1	-2.22749	2.29987
K13755	calcium/calmodulin-dependent 3',5'-cyclic nucleotide phosphodiesterase	PDE1	1.31224	-1.30205
K08574	calpain-5	CAPN5	-1.6342	1.09035
K10423	CAP-Gly domain-containing linker protein 3/4	CLIP3_4	1.27096	-1.50238
K03097	casein kinase II subunit alpha	CSNK2A	-1.29627	-1.02946
K04397	caspase 7	CASP7	1.63136	1.28138
K04399	caspase 9	CASP9	1.25598	-1.14577
K01363	cathepsin B	CTSB	1.09785	4.4977
K01365	cathepsin L	CTSL	3.74486	-1.56854
K10089	cation-dependent mannose-6-phosphate receptor	M6PR	-1.14368	1.34637
K12605	CCR4-NOT transcription complex subunit 2	CNOT2, NOT2	-1.30276	1.35698
K10643	CCR4-NOT transcription complex subunit 4	CNOT4, NOT4, MOT2	-1.05337	-1.78519
K06563	CD209 antigen	CD209	-1.17344	1.27928
K09250	cellular nucleic acid-binding protein	CNBP	-1.0054	1.29391
K07376	cGMP-dependent protein kinase 1	PRKG1	-2.25494	1.5288
K04245	chemokine-like receptor 1	CMKLR1	-1.8	1.45
K05022	chloride intracellular channel protein 2	CLIC2	1.11816	-1.74127
K04742	chondroitin 4-sulfotransferase 12	CHST12	-2.24639	2.63025
K06793	chondroitin sulfate proteoglycan 2 (versican)	CSPG2, VCAN	2.90663	-2.89095
K11586	chromobox protein 3	CBX3, HP1G	-1.37486	-1.06066
K06087	claudin	CLDN	-1.31414	1.28723
K16578	CLIP-associating protein 1/2	CLASP1_2	1.09042	1.59132
K12871	coiled-coil domain-containing protein 12	CCDC12	-1.30653	1.02477
K16452	coiled-coil domain-containing protein 92	CCDC92	-1.5001	1.30004
K13195	cold-inducible RNA-binding protein	CIRBP	-1.38144	-1.02227
K06236	collagen, type I/II/III/V/XI/XXIV/XXVII, alpha	COL1AS	1.17213	-1.23825
K04004	complement factor H	HF1	1.19409	-1.22914
K01937	CTP synthase	pyrG, CTPS	-1.44681	-1.90995
K12671	C-X-C motif chemokine 10	CXCL10, IP10	2.15341	-1.10485
K05868	cyclin B	CCNB	-2	1.55
K02087	cyclin-dependent kinase 1	CDK1, CDC2	1.06501	2.50216
K13907	cystatin-A/B	CSTA_B	1.12142	1.35179
K02267	cytochrome c oxidase subunit 6b	COX6B	1.16635	-1.13631
K07422	cytochrome P450, family 2, subfamily U, polypeptide 1	CYP2U1	-1.13037	-1.70848
K06051	delta	DLL	1.08901	-1.18067
K00222	delta14-sterol reductase	TM7SF2, ERG24	-1.20829	1.38978
K08656	dipeptidyl-peptidase 9	DPP9	1.755	-1.71375
K01276	dipeptidyl-peptidase II	DPP7	1.08374	-1.22152
K07766	diphosphoinositol-polyphosphate diphosphatase	E3.6.1.52	-1.0264	1.26451
K17866	diphthamide biosynthesis protein 2	DPH2	-2.25352	-1.34554
K02328	DNA polymerase delta subunit 2	POLD2	-1.58323	1.19049
K03505	DNA polymerase delta subunit 4	POLD4	1.50149	1.0593
K03512	DNA polymerase lambda	POLL	-1.60805	-1.15692
K02331	DNA polymerase phi	POL5, MYBBP1A	-1.94408	-1.24735
K02350	DNA polymerase zeta	POLZ1, rev3	-1.64595	-1.00349
K04680	DNA-binding protein inhibitor ID1	ID1	1.29188	-1.23117
K09518	DnaJ homolog subfamily B member 12	DNAJB12	1.76854	-1.12927
K09532	DnaJ homolog subfamily C member 12	DNAJC12	1.26055	-1.40198
K09537	DnaJ homolog subfamily C member 17	DNAJC17	1.15203	-1.10772
K09523	DnaJ homolog subfamily C member 3	DNAJC3	-1.14565	-2.7654
K10413	dynein heavy chain 1, cytosolic	DYNC1H	2.51619	-1.1069
K10415	dynein intermediate chain, cytosolic	DYNC1I, DNCI	-1.18606	1.03635
K12232	E3 ubiquitin-protein ligase HECTD2	HECTD2	1.74681	-1.67523
K10693	E3 ubiquitin-protein ligase MYCBP2	MYCBP2, PAM	1.09827	-1.75357
K11974	E3 ubiquitin-protein ligase RNF31	RNF31	3.7164	-1.43442
K10203	elongation of very long chain fatty acids protein 6	ELOVL6	1.20301	2.38905
K07739	elongator complex protein 3	ELP3, KAT9	-1.23767	1.08502
K14797	essential nuclear protein 1	ENP1, BYSL	-1.85624	-1.20286
K12590	exosome complex component RRP46	RRP46, EXOSC5	-1.55457	-1.10647
K13210	far upstream element-binding protein	FUBP	-1.53828	1.22508
K10270	F-box and leucine-rich repeat protein 4	FBXL4	-2.11353	2.84973
K07983	Fc receptor, IgE, high affinity I, gamma polypeptide	FCER1G	-1.69134	1.91937
K15516	fragile X mental retardation protein	FMR	-2.53341	2.76336
K01623	fructose-bisphosphate aldolase, class I	ALDO	2.18191	-1.3365
K01555	fumarylacetoacetase	FAH, fahA	1.15437	1.7
K08341	GABA(A) receptor-associated protein	GABARAP, ATG8, LC3	1.25	-1.25
K17894	GATA-binding protein 2	GATA2	2.3	-1.25
K05768	gelsolin	GSN	-2.69421	1.11267
K15376	gephyrin	GPHN	1.58862	-1.82133
K00851	gluconokinase	E2.7.1.12, gntK, idnK	1.38642	-1.1612
K00261	glutamate dehydrogenase (NAD(P)+)	GLUD1_2, gdhA	-1.29099	1.07852
K01915	glutamine synthetase	glnA, GLUL	1.27617	-1.09837
K00252	glutaryl-CoA dehydrogenase	GCDH, gcdH	-1.07906	1.38889
K00799	glutathione S-transferase	GST, gst	1.44137	-1.14072
K00281	glycine dehydrogenase	GLDC, gcvP	-1.84239	-1.10996
K08495	golgi SNAP receptor complex member 1	GOSR1, GOS1	1.33676	-1.16446
K04402	growth arrest and DNA-damage-inducible protein	GADD45	1.92244	-1.35849
K07827	GTPase KRas	KRAS, KRAS2	-1.07238	1.23209
K01139	guanosine-3',5'-bis(diphosphate) 3'-pyrophosphohydrolase	spoT, HDDC3	-1.09841	1.24793
K12741	heterogeneous nuclear ribonucleoprotein A1/A3	HNRNPA1_3	1.1754	-1.0557
K12887	heterogeneous nuclear ribonucleoprotein M	HNRNPM	-1.25287	-1.07017
K13161	heterogeneous nuclear ribonucleoprotein R	HNRNPR	-1.13004	1.08475
K12888	heterogeneous nuclear ribonucleoprotein U	HNRNPU	-1.38858	-1.03793
K06498	high affinity immunoglobulin gamma Fc receptor I	FCGR1A, CD64	2.42319	-1.59961
K11446	histone demethylase JARID1	KDM5, JARID1	-1.65254	2.02346
K11275	histone H1/5	H1_5	1.4166	-1.43
K11251	histone H2A	H2A	-1.05	1.15
K11253	histone H3	H3	-1.30803	2.06245
K09305	homeobox protein HoxA/B/C5	HOX_5	-1.9544	1.35907
K18490	homeobox protein OTX2	OTX2	1.55976	-2.36092
K08785	HtrA serine peptidase 3	HTRA3	1.89925	-1.55372
K01640	hydroxymethylglutaryl-CoA lyase	E4.1.3.4, HMGCL, hmgL	1.46748	-1.43255
K09095	hypoxia-inducible factor 2 alpha	HIF2A, EPAS1	-1.02244	1.66504
K05719	integrin beta 1	ITGB1	1.10133	-1.19321
K10154	interferon regulatory factor 6	IRF6	1.3729	-1.17443
K05425	interleukin 12B	IL12B	1.22304	-1.23629
K05055	interleukin 6 receptor	IL6R	1.04438	-1.24251
K13089	interleukin enhancer-binding factor 2	ILF2	-1.05118	1.29625
K11217	Janus kinase 1	JAK1	-1.62195	1.52078
K06709	jumonji domain-containing protein 2	KDM4, JMJD2, JHDM3	-1.15351	1.41633
K13959	kelch-like protein 38	KLHL38	1.12194	-1.44985
K17084	kindlin 3	FERMT3, KIND3	1.01604	-1.46652
K17975	kinectin	KTN1	-1.33401	-1.04085
K09228	KRAB domain-containing zinc finger protein	KRAB	1.44	-1.37
K09207	krueppel-like factor 6/7	KLF6_7	1.0316	2.12077
K00816	kynurenine---oxoglutarate transaminase / cysteine-S-conjugate beta-lyase / glutamine---phenylpyruvate transaminase	CCBL	-1.09723	-2.06992
K07611	lamin B	LMNB	-1.66917	-1.00743
K05636	laminin, beta 1	LAMB1	1.22687	-1.23534
K02888	large subunit ribosomal protein L21	RP-L21, MRPL21, rplU	-1.16937	1.48167
K04454	MADS-box transcription enhancer factor 2C	MEF2C	-1.17805	1.5837
K15129	mediator of RNA polymerase II transcription subunit 8	MED8	1.68336	-1.05192
K17573	meiosis arrest female protein 1	LKAP, MARF1	1.02579	-1.486
K16866	metalloproteinase inhibitor 3	TIMP3	1.26072	-1.22934
K01265	methionyl aminopeptidase	map	-1.21805	1.23919
K13221	methylosome protein 50	WDR77, MEP50	-2.07279	-1.11486
K08209	MFS transporter, OCT family, solute carrier family 22 (organic cation transporter), member 13	SLC22A13	-1.07302	3.37206
K14572	midasin	MDN1, REA1	-1.7924	-1.16408
K17770	mitochondrial import receptor subunit TOM20	TOM20	-1.30606	1.0773
K17769	mitochondrial import receptor subunit TOM22	TOM22	-1.82845	-1.18909
K06030	mitofusin	MFN	-1.21266	3.49979
K04433	mitogen-activated protein kinase kinase 6	MAP2K6, MKK6	-2.02432	1.84398
K04428	mitogen-activated protein kinase kinase kinase 4	MAP3K4, MEKK4	-1.3681	1.47637
K08833	mitogen-activated protein kinase kinase kinase kinase 5	MAP4K5, KHS1	1.19031	-1.60678
K06637	mitotic checkpoint serine/threonine-protein kinase BUB1 beta	BUB1B, BUBR1, MAD3L	1.25856	1.01206
K04043	molecular chaperone DnaK	dnaK	-1.66196	-1.08946
K15448	multifunctional methyltransferase subunit TRM112	TRM112, TRMT112	-1.40142	-1.08723
K04729	myeloid differentiation primary response protein MyD88	MYD88	-1.55066	1.33698
K10356	myosin I	MYO1	1.15015	-1.38545
K12749	myosin light chain 3	MYL3	1.10405	-1.28162
K01301	N-acetylated-alpha-linked acidic dipeptidase	NAALAD	1.336	-1.38194
K12800	NACHT, LRR and PYD domains-containing protein 3	NLRP3, PYPAF1	1.1266	-1.43847
K00858	NAD+ kinase	ppnK, NADK	1.4106	-1.31671
K11411	NAD-dependent deacetylase sirtuin 1	SIRT1, SIR2L1	-1.34354	1.3397
K06757	neurofascin	NFASC	1.09518	-1.18397
K04360	neurotrophic tyrosine kinase receptor type 2	NTRK2, TRKB	-3.00862	1.04751
K04816	nicotinic acetylcholine receptor delta	CHRND	-2.45826	1.47237
K13216	nuclear inhibitor of protein phosphatase 1	PPP1R8, NIPP1	-1.9366	1.99376
K14304	nuclear pore complex protein Nup85	NUP85	5.09355	-1.46306
K14573	nucleolar protein 4	NOP4, RBM28	-1.6	1.7
K11294	nucleolin	NCL, NSR1	-1.57067	-1.31855
K11276	nucleophosmin 1	NPM1	1.14334	-1.13019
K17609	nucleoredoxin	NXN	1.31235	-1.33632
K02604	origin recognition complex subunit 2	ORC2	-1.50179	2.43596
K16479	outer dense fiber protein 2	ODF2	-1.52174	-1.0308
K04441	p38 MAP kinase	P38	-1.2035	1.11719
K16816	patatin-like phospholipase domain-containing protein 2	PNPLA2, ATGL	-1.33743	1.11843
K03267	peptide chain release factor subunit 3	ERF3, GSPT	-1.166	-1.45157
K17284	perilipin-2	PLIN2, ADRP	-1.73408	1.24994
K13338	peroxin-1	PEX1	1.28576	-1.63471
K13279	peroxiredoxin 1	PRDX1	-1.05479	1.39745
K11187	peroxiredoxin 5, atypical 2-Cys peroxiredoxin	PRDX5	-1.15429	1.13683
K01889	phenylalanyl-tRNA synthetase alpha chain	FARSA, pheS	1.63976	-2.57335
K15728	phosphatidate phosphatase LPIN	LPIN	1.9209	-1.67818
K05929	phosphoethanolamine N-methyltransferase	E2.1.1.103, NMT	1.55481	1.01389
K01112	phosphohistidine phosphatase	PHPT1	-1.08061	-1.45262
K19178	POLQ-like helicase	HELQ	1.08121	-1.23249
K13162	poly(rC)-binding protein 2/3/4	PCBP2_3_4	-1.27987	1.09083
K13126	polyadenylate-binding protein	PABPC	-1.32872	1.03075
K13073	polymeric immunoglobulin receptor	PIGR	1.26338	-1.58261
K14399	polyribonucleotide 5'-hydroxyl-kinase	CLP1, HERB	2.62228	-1.61832
K00962	polyribonucleotide nucleotidyltransferase	pnp, PNPT1	-1.40342	1.03829
K04875	potassium voltage-gated channel Shaker-related subfamily A member 2	KCNA2	-1.39521	1.79643
K12816	pre-mRNA-processing factor 17	CDC40, PRP17	-1.37059	2.13003
K13106	pre-mRNA-splicing factor CWC26	BUD13, CWC26	-1.28124	-1.0029
K14800	pre-rRNA-processing protein TSR2	TSR2	-1.43514	1.03409
K04727	programmed cell death 8 (apoptosis-inducing factor)	PDCD8, AIF	1.04231	-1.24888
K17081	prohibitin 2	PHB2	1.105	1.6955
K13948	prostaglandin reductase 1	PTGR1, LTB4DH	-1.28215	1.91515
K11436	protein arginine N-methyltransferase 3	PRMT3	-2.41026	-1.45989
K08056	protein disulfide isomerase family A, member 3	PDIA3, GRP58	2.38015	-1.45723
K09582	protein disulfide-isomerase A4	PDIA4, ERP72	1.56823	-1.32967
K14825	protein ERP2	ERP2	-1.51887	-1.0218
K15434	protein FAM98B	FAM98B	1.54816	-1.39786
K11347	protein Jade-1	PHF17, JADE1	-1.22333	1.23534
K12877	protein mago nashi	MAGOH	-1.08641	1.17882
K09667	protein O-GlcNAc transferase	OGT	-1.38613	2.10732
K18625	protein Shroom	SHROOM	-2.89259	-1.06506
K18735	protein SMG9	SMG9	1.17795	-1.2848
K08533	RAR-related orphan receptor beta	NR1F2, RORB	-1.84765	1.88961
K04392	Ras-related C3 botulinum toxin substrate 1	RAC1	-1.06048	1.24472
K16185	Ras-related GTP-binding protein A/B	RRAGA_B	1.76054	-1.03019
K07899	Ras-related protein Rab-9A	RAB9A, RAB9	1.246	-4.04224
K15559	regulator of Ty1 transposition protein 103	RTT103	-1.52457	1.17889
K08062	regulatory factor X-associated ankyrin-containing protein	RFXANK	-2.85739	1.33915
K19514	renin receptor	ATP6AP2, PRR	1.20004	-1.0269
K10755	replication factor C subunit 2/4	RFC2_4	-2.39319	-1.2166
K00852	ribokinase	rbsK, RBKS	1.30539	-1.32439
K03469	ribonuclease HI	rnhA, RNASEH1	1.25814	-1.09403
K14851	ribosomal RNA-processing protein 17	RRP17, NOL12	-1.21696	1.08497
K14848	ribosome assembly protein RRB1	RRB1, GRWD1	-2.0129	-1.45833
K10611	RING-box protein 2	RBX2, ROC2, RNF7	1.26589	1.06673
K08872	RIO kinase 3	RIOK3, SUDD	-1.04726	1.48274
K15433	RLL motif containing protein 1	CGI99, CLE7, RLLM1	1.31946	-1.72761
K15433	RLL motif containing protein 1	CGI99, CLE7, RLLM1	1.24776	-1.3109
K18732	SAP domain-containing ribonucleoprotein	SARNP, CIP29, THO1	1.06654	1.43297
K14026	SEL1 protein	SEL1, SEL1L	-1.61049	1.18771
K16312	serine/threonine-protein kinase 40	STK40, SHIK	1.13626	-3.35461
K06269	serine/threonine-protein phosphatase PP1 catalytic subunit	PPP1C	-1.9	1.75
K13963	serpin B	SERPINB	1.27763	-1.19999
K12948	signal peptidase complex subunit 3	SPCS3, SPC3	1.2243	1.00147
K13431	signal recognition particle receptor subunit alpha	SRPR	-1.81931	1.61456
K03111	single-strand DNA-binding protein	ssb	1.21407	-1.25413
K02991	small subunit ribosomal protein S6e	RP-S6e, RPS6	1.38593	1.01601
K02997	small subunit ribosomal protein S9e	RP-S9e, RPS9	1.45237	-1.16861
K12160	small ubiquitin-related modifier	SUMO, SMT3	-1.44501	1.26725
K03094	S-phase kinase-associated protein 1	SKP1, CBF3D	-1.1667	1.05844
K12893	splicing factor, arginine/serine-rich 4/5/6	SFRS4_5_6	1.52579	-4.04552
K06669	structural maintenance of chromosome 3 (chondroitin sulfate proteoglycan 6)	SMC3, CSPG6	-1.02446	1.35332
K00235	succinate dehydrogenase (ubiquinone) iron-sulfur subunit	SDHB, SDH2	1.28122	-1.23146
K18168	succinate dehydrogenase assembly factor 2	SDHAF2, SDH5	1.3515	1.00372
K04694	suppressor of cytokine signaling 1	SOCS1, JAB	4.31854	-1.42546
K13130	survival of motor neuron protein-interacting protein 1	SIP1, GEMIN2	-2.52164	1.27483
K14439	SWI/SNF-related matrix-associated actin-dependent regulator of chromatin subfamily A containing DEAD/H box 1	SMARCAD1	-2.39936	-1.13352
K11651	SWI/SNF-related matrix-associated actin-dependent regulator of chromatin subfamily E, member 1	SMARCE1	-1.22785	1.09261
K16336	syndecan 2	SDC2	1.59402	-1.17208
K03424	TatD DNase family protein	tatD	1.66766	-1.237
K09494	T-complex protein 1 subunit beta	CCT2	-1.58578	-1.07439
K09495	T-complex protein 1 subunit gamma	CCT3, TRIC5	-1.49308	-1.02371
K17293	tetraspanin-3	TSPAN3	1.04172	-1.2667
K06571	tetraspanin-7	TSPAN7, TM4SF2, MXS1	1.4609	-1.00149
K17349	tetraspanin-8	TSPAN8	-1.21244	1.43164
K01343	tissue plasminogen activator	PLAT	-1.99341	1.87577
K03125	transcription initiation factor TFIID subunit 1	TAF1	-1.28899	1.88358
K03236	translation initiation factor 1A	EIF1A	-1.17159	1.06701
K03259	translation initiation factor 4E	EIF4E	-1.4359	1.40561
K03260	translation initiation factor 4G	EIF4G	-1.42996	1.01686
K13249	translocon-associated protein subunit alpha	SSR1	-1.43538	1.76113
K09633	transmembrane protease, serine 2	TMPRSS2	1.26211	-1.06242
K01046	triacylglycerol lipase	E3.1.1.3	-5.50484	-1.40574
K14415	tRNA-splicing ligase RtcB	RTCB, rtcB	1.03661	1.31401
K07374	tubulin alpha	TUBA	-1.26265	1.61518
K17607	type 2A phosphatase activator TIP41	TIPRL, TIP41	1.09933	1.74258
K07604	type I keratin, acidic	KRT1	1.62434	-1.3402
K00506	tyrosinase-related protein 1	TYRP1	2.80066	-1.69677
K00501	tyrosine 3-monooxygenase	TH	1.92	-1.21444
K11092	U2 small nuclear ribonucleoprotein A'	SNRPA1	-1.34134	1.00549
K14554	U3 small nucleolar RNA-associated protein 21	UTP21, WDR36	-1.8675	-1.14563
K14768	U3 small nucleolar RNA-associated protein 7	UTP7, WDR46	-1.53342	-1.18985
K12625	U6 snRNA-associated Sm-like protein LSm6	LSM6	-1.22062	1.16532
K11844	ubiquitin carboxyl-terminal hydrolase 16/45	USP16_45	-4.41006	1.03462
K05610	ubiquitin carboxyl-terminal hydrolase L5	UCHL5, UCH37	1.89448	1.08971
K14016	ubiquitin fusion degradation protein 1	UFD1	1.05191	-1.28004
K18343	ubiquitin thioesterase otulin	FAM105B	1.32861	-1.07441
K04552	ubiquitin-conjugating enzyme E2 L3	UBE2L3, UBCH7	-1.51976	1.74069
K10587	ubiquitin-protein ligase E3 A	UBE3A, E6AP	1.0264	4.60798
K18466	vacuolar protein sorting-associated protein 26	VPS26	-1.20887	1.02534
K12196	vacuolar protein-sorting-associated protein 4	VPS4	1.68295	-1.56712
K10703	very-long-chain (3R)-3-hydroxyacyl-CoA dehydratase	PHS1, PAS2	-1.02788	1.41977
K02150	V-type H+-transporting ATPase subunit E	ATPeV1E, ATP6E	1.47332	-1.01333
K17601	WD repeat-containing protein 81	WDR81	1.55992	-1.19544
K00572	wingless-type MMTV integration site family, member 7	WNT7	1.37144	-1.02985
K00733	xylosylprotein 4-beta-galactosyltransferase	B4GALT7	1.18718	-1.3159
K10492	zinc finger and BTB domain-containing protein 5	ZBTB5	-1.68963	2.48301
K17578	zinc finger CCHC domain-containing protein 9	ZCCHC9	1.69841	-4.50286
K10350	Zyg-11 protein homolog	ZYG11	-1.34935	2.31051
